# Supplementary material for: Anthropogenic influences on the distribution of a threatened apex-predator around sustainable-use reserves following hydropower dam installation
Source: PeerJ. 2022 Oct 20;10:e14287. doi: 10.7717/peerj.14287 (PMC9588301; doi:10.7717/peerj.14287)
Supplement: Supplemental Information 1 [file peerj-10-14287-s001.xls]

## Sheet: readme_metadata
Article:	Anthropogenic influences on the distribution of a threatened apex-predator around sustainable-use reserves following hydropower dam installation
Supplemental material with data to generate figures and run analysis
Sheet name	Description
giantotter_detections	raw data
Column name	Column description
before_after	Surveys before (2011-2012, 2015) or after (2017-2019) dam construction.
subz_id	Id code of each survey subzone.
zone3	Id of each survey zone.
long	Location of subzone center. Longitude. Decimal degrees. EPSG = 4326.
lat	Location of subzone center. Latitude. Decimal degrees. EPSG = 4326.
presence_pb	Were giant otters detected? 1 = yes, 0 = no.
tot_det	Total detections.
km_pb	Relative abundance (detections / effort).
obscov_km	Effort (km).
houses	Distance to nearest house (km).

## Sheet: giantotter_detections
before_after	subz_id	zone3	long	lat	presence_pb	tot_det	km_pb	obscov_km	houses
before	4	reservoir	-51.3741	0.741146	0	0	0	82.957	0.250301
before	5	reservoir	-51.4136	0.71866	0	0	0	100.321	0.250213
before	6	reservoir	-51.456	0.717583	0	0	0	77.268	1.20826
before	7	reservoir	-51.4785	0.742287	0	0	0	74.552	0.353916
before	8	reservoir	-51.5257	0.738602	0	0	0	69.375	0.353916
before	9	reservoir	-51.5612	0.737694	0	0	0	57.698	0.500425
before	10	reservoir	-51.5832	0.754319	1	2	0.0319448	62.608	1.0012
before	11	reservoir	-51.603	0.786573	0	0	0	68.822	0.250301
before	12	reservoir	-51.6063	0.830904	0	0	0	69.847	0
before	13	reservoir	-51.6268	0.869834	1	1	0.0133561	74.872	0.353916
before	14	reservoir	-51.6035	0.904004	0	0	0	83.693	0.500601
before	15	intermediate impact	-51.6168	0.935835	0	0	0	142.741	3.22805
before	16	intermediate impact	-51.6535	0.959856	0	0	0	156.676	0.750638
before	17	intermediate impact	-51.6678	0.989939	0	0	0	126.323	0.854518
before	18	intermediate impact	-51.6899	0.999631	0	0	0	179.921	0.854518
before	19	intermediate impact	-51.7077	0.989805	1	1	0.00602105	166.084	1.91627
before	20	intermediate impact	-51.7476	0.977567	0	0	0	145.014	7.14602
before	21	intermediate impact	-51.7688	0.990053	1	1	0.00834648	119.811	10.4171
before	22	intermediate impact	-51.7983	0.98098	1	2	0.0190391	105.047	15.2932
before	23	intermediate impact	-51.8153	0.999363	1	3	0.0330171	90.862	20.3165
before	24	intermediate impact	-51.8361	1.03401	0	0	0	32.11	25.0035
before	25	intermediate impact	-51.867	1.03847	0	0	0	36.142	29.5435
before	26	intermediate impact	-51.8909	1.05092	1	1	0.0407332	24.55	34.0658
before	27	intermediate impact	-51.9107	1.06916	0	0	0	24.469	38.8564
before	28	intermediate impact	-51.9301	1.0463	0	0	0	23.38	43.4394
before	29	intermediate impact	-51.9635	1.05663	0	0	0	22.446	48.2725
before	39	low impact	-51.5948	0.944275	0	0	0	153.532	0.250213
before	40	low impact	-51.6053	0.972279	0	0	0	163.32	2.77043
before	41	low impact	-51.5953	0.992959	1	2	0.0111971	178.618	2.01988
before	42	low impact	-51.5858	1.02046	1	3	0.0164397	182.485	5.8954
before	43	low impact	-51.5611	1.04787	1	1	0.00484961	206.202	10.375
before	44	low impact	-51.527	1.04928	1	5	0.0308054	162.309	14.5429
before	45	low impact	-51.5076	1.06654	1	1	0.0101914	98.122	18.2715
before	46	low impact	-51.486	1.08643	1	3	0.0351247	85.41	22.2326
before	47	low impact	-51.4553	1.11143	0	0	0	59.448	27.0229
before	48	low impact	-51.4481	1.14846	0	0	0	48.707	31.1919
before	49	low impact	-51.4351	1.18811	1	1	0.0245435	40.744	36.6122
before	50	low impact	-51.4449	1.23007	0	0	0	26.829	41.2819
before	51	low impact	-51.4335	1.25501	0	0	0	31.872	45.6148
before	52	low impact	-51.4	1.27645	0	0	0	21.195	50.405
after	4	reservoir	-51.3741	0.741146	0	0	0	130.533	0.250301
after	5	reservoir	-51.4136	0.71866	0	0	0	108.952	0.250213
after	6	reservoir	-51.456	0.717583	0	0	0	45.057	0.604129
after	7	reservoir	-51.4785	0.742287	0	0	0	42.321	0.604129
after	8	reservoir	-51.5257	0.738602	0	0	0	41.488	2.27001
after	9	reservoir	-51.5612	0.737694	0	0	0	49.559	1.56217
after	10	reservoir	-51.5832	0.754319	0	0	0	53.392	1.10482
after	11	reservoir	-51.603	0.786573	0	0	0	56.174	0.250213
after	12	reservoir	-51.6063	0.830904	0	0	0	52.365	0
after	13	reservoir	-51.6268	0.869834	0	0	0	55.83	0.353916
after	14	reservoir	-51.6035	0.904004	0	0	0	64.996	0.500601
after	15	intermediate impact	-51.6168	0.935835	0	0	0	102.148	0
after	16	intermediate impact	-51.6535	0.959856	0	0	0	97.226	1.00085
after	17	intermediate impact	-51.6678	0.989939	0	0	0	79.893	1.35512
after	18	intermediate impact	-51.6899	0.999631	0	0	0	86.735	0.500601
after	19	intermediate impact	-51.7077	0.989805	0	0	0	74.723	1.81256
after	20	intermediate impact	-51.7476	0.977567	0	0	0	74.283	7.04232
after	21	intermediate impact	-51.7688	0.990053	1	1	0.0155448	64.33	10.3134
after	22	intermediate impact	-51.7983	0.98098	0	0	0	57.962	15.1895
after	23	intermediate impact	-51.8153	0.999363	0	0	0	56.054	20.2128
after	24	intermediate impact	-51.8361	1.03401	0	0	0	17.457	19.1437
after	25	intermediate impact	-51.867	1.03847	0	0	0	21.778	14.8111
after	26	intermediate impact	-51.8909	1.05092	0	0	0	21.174	10.0814
after	27	intermediate impact	-51.9107	1.06916	0	0	0	21.701	5.29083
after	28	intermediate impact	-51.9301	1.0463	0	0	0	20.708	0.707833
after	29	intermediate impact	-51.9635	1.05663	0	0	0	22.441	3.87507
after	39	low impact	-51.5948	0.944275	1	4	0.0289677	138.085	0.250213
after	40	low impact	-51.6053	0.972279	1	1	0.00726998	137.552	0.958045
after	41	low impact	-51.5953	0.992959	1	1	0.00752174	132.948	0.604129
after	42	low impact	-51.5858	1.02046	1	3	0.0229885	130.5	4.47964
after	43	low impact	-51.5611	1.04787	1	2	0.0144306	138.594	8.9592
after	44	low impact	-51.527	1.04928	1	1	0.00767365	130.316	13.1271
after	45	low impact	-51.5076	1.06654	1	1	0.00792908	126.118	16.8558
after	46	low impact	-51.486	1.08643	1	1	0.00920904	108.589	20.8168
after	47	low impact	-51.4553	1.11143	0	0	0	53.185	25.6071
after	48	low impact	-51.4481	1.14846	0	0	0	39.553	29.7762
after	49	low impact	-51.4351	1.18811	1	1	0.0302151	33.096	35.1965
after	50	low impact	-51.4449	1.23007	0	0	0	37.773	39.8661
after	51	low impact	-51.4335	1.25501	0	0	0	38.493	44.199
after	52	low impact	-51.4	1.27645	0	0	0	18.427	48.9892
